# Supplementary material
Source: Elsevier journal article supplement (https://www.sciencedirect.com/science/article/pii/S0211563816300992)
Supplement: mmc1 [file S0211563816300992:mmc1.doc]

**
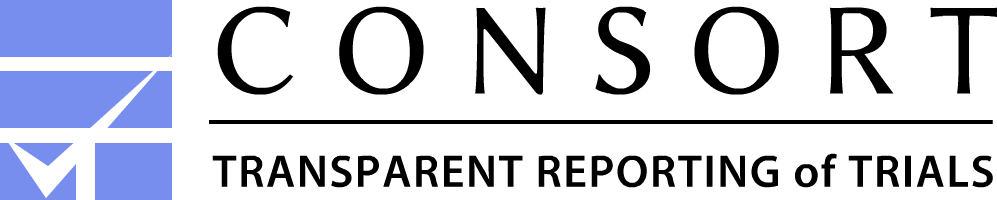
**

**CONSORT 2010 Flow Diagram**

**Enrollment**

**Allocation**

**Allocation**

**Follow-Up**

**Follow-Up**

**Analysis**

**Analysis**

Assessed for eligibility (n= 83)

Excluded (n= 8)

  Not meeting inclusion criteria (n=8)

  Declined to participate (n= 0)

  Other reasons (n=0)

Analysed (n=25)
 Excluded from analysis (give reasons) (n=0)

Lost to follow-up (give reasons) (n= 0)

Discontinued intervention (give reasons) (n= 0)

Allocated to intervention (n= 25)

 Received allocated intervention (n=25 )

 Did not receive allocated intervention (give reasons) (n=0)

Lost to follow-up (give reasons) (n= 0)

Discontinued intervention (give reasons) (n=0)

Allocated to intervention (n=25)

 Received allocated intervention (n=25 )

 Did not receive allocated intervention (give reasons) (n=0 )

Analysed (n= 25)
 Excluded from analysis (give reasons) (n=0)

Randomized (n=75)

Allocated to intervention (n= 25)

 Received allocated intervention (n= 25)

 Did not receive allocated intervention (give reasons) (n=0 )

Lost to follow-up (give reasons) (n=0 )

Discontinued intervention (give reasons) (n=0)

Analysed (n=25)
 Excluded from analysis (give reasons) (n=0)
